# 1 The potential of SARS-CoV-2 antigen-detection tests in 2 the screening of asymptomatic persons

## 3 4 **Authors:**

5 Jonas Wachinger<sup>1\*</sup>, Ioana Diana Olaru<sup>1,2\*</sup>, Susanne Horner<sup>1</sup>, Paul Schnitzler<sup>1</sup>, Klaus Heeg<sup>1</sup>,  
6 Claudia M. Denking<sup>1,3</sup>

7 \* Joint first authors

8  
9 1 Center of Infectious Diseases, Heidelberg University Hospital, Heidelberg, Germany

10 2 Clinical Research Department, Faculty of Infectious and Tropical Diseases, London School  
11 of Hygiene and Tropical Medicine, London, United Kingdom

12 3 German Center of Infection Research, Site Heidelberg, Heidelberg, Germany

13

14 **Keywords:** SARS-CoV-2, Ag-RDTs, screening, diagnostic yield, positive predictive value

15

## 16 **To whom correspondence should be addressed:**

17 Claudia M. Denking; [Claudia.denking@uni-heidelberg.de](mailto:Claudia.denking@uni-heidelberg.de) Tel.: +49 6221 56-22999

18 Center of Infectious Diseases, Heidelberg University Hospital, Im Neuenheimer Feld 324,

19 69120 Heidelberg, Germany

20

## 21 **Abstract**

22 **Objectives:** To assess the performance of antigen-based rapid diagnostic tests (Ag-RDTs) for  
23 SARS CoV-2 when implemented for large-scale universal screening of asymptomatic  
24 individuals.

25 **Methods:** This study presents data from a pragmatic implementation study for universal Ag-  
 26 RDT-based screening at a tertiary care hospital in Germany where all incoming patients  
 27 without symptoms suggestive of SARS-CoV-2 were screened with an Ag-RDT prior to  
 28 admission since October 2020.

29 **Results:** In total, 49,542 RDTs were performed in 27,199 asymptomatic individuals over a  
 30 duration of five months. Out of 222 positive results, 196 underwent in-house confirmatory  
 31 testing with PCR, out of which 170 were confirmed positive, indicating a positive predictive  
 32 value (PPV) of 86.7%. Negative Ag-RDTs were not routinely tested with PCR, but a total of  
 33 94 cases of false negative Ag-RDTs were detected due to PCR tests being performed within  
 34 the following five days with a median CT-value of 33.

35 **Conclusions:** This study provides evidence that Ag-RDTs can have a high diagnostic yield  
 36 for transmission relevant infections with limited false-positives when utilized at the point of  
 37 care on asymptomatic patients and thus can be a suitable public-health test for universal  
 38 screening.

## 39 **Introduction**

40 Several researchers and policy makers, supported by evidence from modelling studies, have  
 41 recently argued to increase large-scale screening for SARS-CoV-2 to curb transmission from  
 42 patients with minimal or no symptoms.[1–5] Antigen-detection point-of-care rapid diagnostic  
 43 tests (Ag-RDTs) have shown very good sensitivity (88%) in persons with high viral load (CT  
 44 <30) along with high specificity (>99%).[6, 7] With their favourable ease-of-use, rapid turn-  
 45 around, and good (although suboptimal) performance, Ag-RDTs meet the characteristics for a  
 46 test for public health use and could allow for better control of transmission if implemented in  
 47 well-designed universal screening strategies.[8, 9] However, one frequently raised concern  
 48 has been the potentially insufficient specificity, leading to large numbers of false-positives  
 49 when using Ag-RDTs in large-scale screening strategies with low prevalence, which could  
 50 conceivably disrupt workflows and undermine trust in the test. Furthermore, in a setting  
 51 where high-risk persons are present (e.g., hospital), concerns exist regarding imperfect  
 52 sensitivity leading to secondary cases and substantial morbidity and mortality. Data from  
 53 large scale screening implementation efforts that would allow to gauge diagnostic yield and  
 54 issues with false-positives are limited.

55

## 56 **Methods**

57 We performed a large-scale, pragmatic implementation study of Ag-RDTs in the context of a  
 58 universal screening program at one of Germany's largest tertiary care hospitals (Heidelberg  
 59 University Hospital, Germany) serving over 100,000 inpatients and 1.3 million outpatients  
 60 per year.[10] The study was conducted between 20 September 2020 and 7 March 2021.  
 61 Patients without SARS-CoV-2 associated symptoms presenting for elective procedures or  
 62 outpatient treatment requiring close contact or longer presence (e.g., dialysis) were screened  
 63 with an Ag-RDT. Depending on setting and local SARS-CoV-2 infection dynamics, other

external personnel (e.g., craftspeople, visitors, translators) were similarly screened. Trained nursing staff performed the STANDARD Q COVID-19 Ag Test (SD Biosensor, Inc. Gyeonggi-do, Korea), a WHO recommended and independently validated instrument-free lateral flow assay for SARS-CoV-2 detection,[11] using nasopharyngeal swabs. In patients with a positive Ag-RDT, an additional nasopharyngeal swab was collected for confirmatory SARS-CoV-2 PCR. Ag-RDT results were confirmed with PCR in selected departments prior to ward admission (e.g., haematology), prior to planned procedures associated with high levels of aerosol production, or when a patient developed SARS-CoV-2 associated symptoms or a cluster of cases occurred. To analyse diagnostic yield of Ag-RDTs and false positives, we systematically extracted results of the Ag-RDTs, as well PCR-tests (with CT values) that were done within 5 days after Ag-RDT screening. PPV and sensitivity were computed using the confirmatory PCR result as reference standard. Analysis was conducted using R v4.0.3 (The R Foundation). The ethical review board at Heidelberg University approved this study (S-811/2020). PPV and sensitivity were computed using the confirmatory PCR result as reference standard.

79

## 80 **Results**

Between 20 September 2020 and 7 March 2021, 49,542 Ag-RDTs were performed in 27,421 asymptomatic individuals. Ag-RDTs were positive in 222 individuals and 49,320 Ag-RDTs were negative in 27,199 individuals. Out of the 222 individuals with positive Ag-RDTs, 196 (88.3%) were also tested using PCR in-house. The PPV for the Ag-RDTs was 170/196 (86.7%, 95%CI 81.2-91.1%). Among patients with a positive confirmatory PCR performed within 5 days of a positive Ag-RDT, the median CT value was 19 (IQR 15-24, Figure 1). Of 27,421 patients with a negative Ag-RDT, 94 had a positive PCR in the 5 days following the Ag-RDT. The median number of days between the tests was 1 (IQR 0-1). Based on these

89 false-negative cases identified via PCR, the overall sensitivity of the Ag-RDT can be  
 90 estimated to be 170/264 (64.4%, 95%CI 58.3-70.2). The median CT value of patients who  
 91 were missed using Ag-RDTs was 33 (IQR 29-35). In total, only 12/94 (12.8%) Ag-RDT  
 92 false-negative patients had a PCR with a CT-value <25, and 10/12 were identified on the  
 93 same or following day.

94

95 Figure 1. SARS-CoV-2 PCR CT-values according to Ag-RDT result (left) and for false-  
 96 negative Ag-RDT results according to the number of days between discordant tests (right).

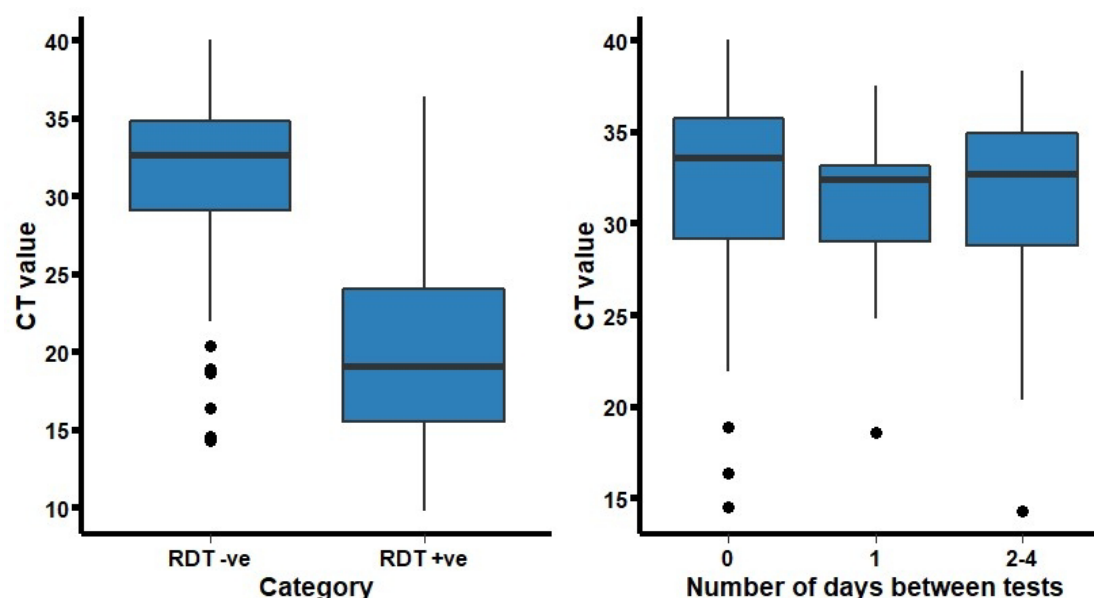

97

98

## 99 Discussion

100 This pragmatic implementation study of a universal screening programme of asymptomatic  
 101 patients at a tertiary care hospital showed the benefit of Ag-RDTs identifying SARS-CoV-2  
 102 infected persons who would have otherwise entered a high-risk environment leading to  
 103 potential secondary transmission. The sensitivity observed in this study is higher than that  
 104 observed in other studies of asymptomatic infections.[7] Although the data on accuracy in  
 105 asymptomatic patients is limited, we acknowledge that the sensitivity estimate is likely an

overestimate, as not all patients with asymptomatic infections were PCR-tested in this pragmatic study. However, the study confirms that most cases at high-risk of causing secondary infections are detected via Ag-RDT. Missed cases with CT<25 on PCR testing were mostly captured within 24hrs and are likely attributable to a negative Ag-RDT in the early phase of disease when the viral load is increasing rapidly.[12] Furthermore, the study showed a very high PPV of the Ag-RDT, thus confirming the high reliability of a positive result on an Ag-RDT shown in accuracy studies.[7]

To the best of our knowledge, this is the first large-scale implementation study of a universal screening program of asymptomatic individuals to analyse the diagnostic yield of Ag-RDTs. The central limitation of this study, inherent to a pragmatic implementation study, is the limited confirmatory PCR testing for negative Ag-RDTs.

In conclusion, this study provides evidence that an Ag-RDT can be a suitable test for large-scale universal screening in a hospital setting and add the important component of a public-health test to our diagnostic armamentarium.

## **Conflict of interest statement**

Mr Wachinger, Dr. Olaru, Mrs Horner, Dr. Schnitzler, and Dr. Heeg have nothing to disclose; Dr. Denkinger reports grants from Ministry of Science, Research and Culture, State of Baden Wuerttemberg, Germany, during the conduct of the study.

## **Funding**

This study was funded in part by the Ministry of Science, Research and the Arts of Baden-Württemberg, Germany, as well as hospital-internal funds

## **Acknowledgments**

None

## Author's Contributions

JW, KH, and CMD conceptualized the study. IDO analysed the data, supported by JW, SH, PS, and CMD. JW, IDO, and CMD drafted the manuscript. All co-authors critically revised and approved the final version of the letter.

## References

- 1 Johnson-León M, Caplan AL, Kenny L, et al. Executive summary: It's wrong not to test: The case for universal, frequent rapid COVID-19 testing. *EClinicalMedicine* 2021;33:100759. doi:10.1016/j.eclinm.2021.100759 [published Online First: 19 February 2021].
- 2 Moghadas SM, Fitzpatrick MC, Sah P, et al. The implications of silent transmission for the control of COVID-19 outbreaks. *Proc Natl Acad Sci USA* 2020;117(30):17513–15.
- 3 World Health Organization. SARS-CoV-2 antigen-detecting rapid diagnostic tests: an implementation guide 2020. Available at: <https://www.who.int/publications/i/item/9789240017740> Accessed April 28, 2021.
- 4 Smith DRM, Duval A, Pouwels KB, et al. Optimizing COVID-19 surveillance in long-term care facilities: A modelling study. *BMC Med* 2020;18(1):386. doi:10.1186/s12916-020-01866-6 [published Online First: 8 December 2020].
- 5 Peeling RW, Olliaro P. Rolling out COVID-19 antigen rapid diagnostic tests: The time is now. *The Lancet Infectious Diseases* 2021;214:836.
- 6 Dinnes J, Deeks JJ, Berhane S, et al. Rapid, point-of-care antigen and molecular-based tests for diagnosis of SARS-CoV-2 infection. *Cochrane Database of Systematic Reviews* 2021;59(1):e01262.

- 7 Brümmer LE, Katzenschlager S, Gaeddert M, et al. The accuracy of novel antigen rapid diagnostics for SARS-CoV-2: A living systematic review and meta-analysis. medRxiv 2021:2021.02.26.21252546.
- 8 Boehme C, Hannay E, Sampath R. SARS-CoV-2 testing for public health use: Core principles and considerations for defined use settings. The Lancet Global Health 2021;9(3):e247-e249.
- 9 Larremore DB, Wilder B, Lester E, et al. Test sensitivity is secondary to frequency and turnaround time for COVID-19 screening. Sci Adv 2021;7(1). doi:10.1126/sciadv.abd5393 [published Online First: 1 January 2021].
- 10 Heidelberg University Hospital. Annual Report 2019 2020. Available at: <https://report.ukhd-mfhd.de/2019/> Accessed April 28, 2021.
- 11 Berger A, Nsoga MTN, Perez-Rodriguez FJ, et al. Diagnostic accuracy of two commercial SARS-CoV-2 antigen-detecting rapid tests at the point of care in community-based testing centers. PLoS ONE 2021;16(3):e0248921.
- 12 Kissler SM, Fauver JR, Mack C, et al. SARS-CoV-2 viral dynamics in acute infections 2020.
